# Supplementary material for: Modeling viscoelasticity through spring–dashpot models in intermittent-contact atomic force microscopy
Source: publisher site journal article supplement (doi:10.3762/bjnano.5.224), 2014-11-18
Supplement: Additional file 1 [file 2190-4286-5-224-S1.pdf]

# **Supporting Information**

for

## **Modeling viscoelasticity through spring–dashpot models in intermittent-contact atomic force microscopy**

Enrique A. López-Guerra and Santiago D. Solares\*

Address: Department of Mechanical Engineering, University of Maryland, College Park, Maryland 20742, United States; Current Address: Department of Mechanical and Aerospace Engineering, George Washington University, Washington, DC 20052, United States

Email: Santiago D. Solares\* - [ssolares@gwu.edu](mailto:ssolares@gwu.edu)

\* Corresponding author

### **Additional simulation data**

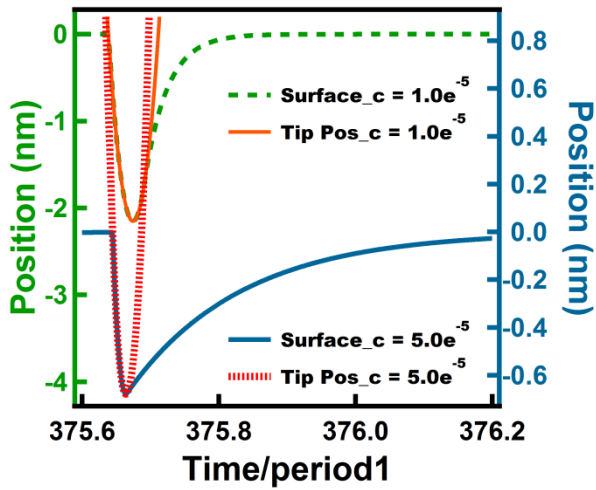

**Figure S1:** Surface response of two Linear Kelvin–Voigt samples interacting with the AFM tip, under a numerically integrated (not prescribed) single-eigenmode tip trajectory. The parameters used for the cantilever dynamics are: cantilever position  $z_c = 80$  nm, natural frequency ( $f_0$ ) = 25 kHz, free amplitude ( $A_{01}$ ) = 100 nm, cantilever stiffness ( $k_{m1}$ ) = 4 N/m. The Kelvin–Voigt parameters for the upper traces are:  $k = 7.5$  N/m and  $c = 1.0 \times 10^{-5}$  N·s/m. The Kelvin–Voigt parameters for the lower traces are:  $k = 7.5$  N/m and  $c = 5.0 \times 10^{-5}$  N·s/m.

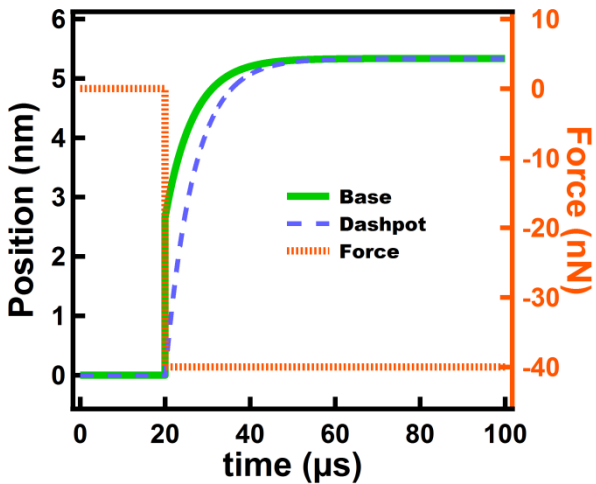

**Figure S2:** Creep simulation performed for an SLS surface. A downward force of 40 nN is applied at time  $t = 20$   $\mu$ s. For this model the surface experiences an immediate elastic response at  $t = 20$   $\mu$ s, which differs from the Kelvin–Voigt case, for which the surface creeps without experiencing an immediate elastic response (see the inset in Figure 2b). The SLS parameters were:  $k_e = k = 7.5$  N/m and  $c = 2.5 \times 10^{-5}$  N·s/m.

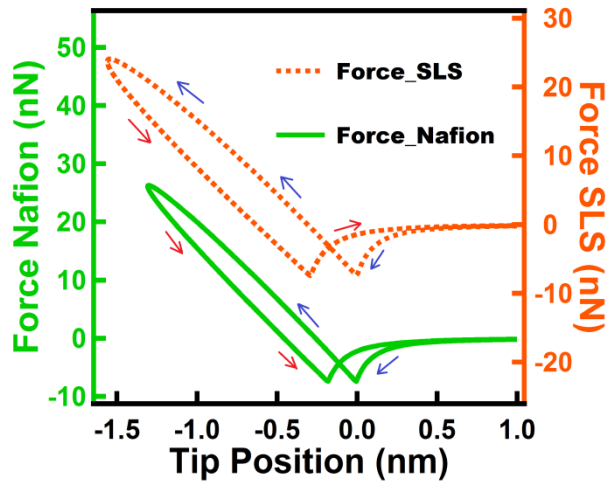

**Figure S3:** Typical force–distance trajectories for the SLS and the Nafion model. The cantilever dynamics parameters were: cantilever position  $z_c = 80$  nm, natural frequency ( $f_0$ ) = 25 kHz, free amplitude ( $A_{01}$ ) = 100 nm, cantilever stiffness ( $k_{m1}$ ) = 4 N/m. The SLS parameters were:  $k_e = 17.5$  N/m,  $k = 7.5$  N/m and  $c = 0.5 \times 10^{-5}$  N·s/m. The Nafion parameters were:  $k_e = 20$  N/m,  $k_1 = 10$  N/m,  $k_2 = 5$  N/m,  $c_1 = 1.0 \times 10^{-5}$  N·s/m,  $c_2 = 10.0 \times 10^{-5}$  N·s/m. The blue and red arrows correspond to approach and retraction of the tip, respectively.
